# Supplementary material
Source: PubMed Central journal article supplement (PMC3145934)
Supplement: tjp0589-3191-SD1.pdf [file tjp0589-3191-SD1.pdf]

## Supplemental material

# Disruption of metabotropic glutamate receptor signalling is a major defect at cerebellar parallel fibre-Purkinje cell synapses in *staggerer* mutant mice

Kazuhiro Mitsumura, Nobutake Hosoi, Nobuhiko Furuya, and Hirokazu Hirai

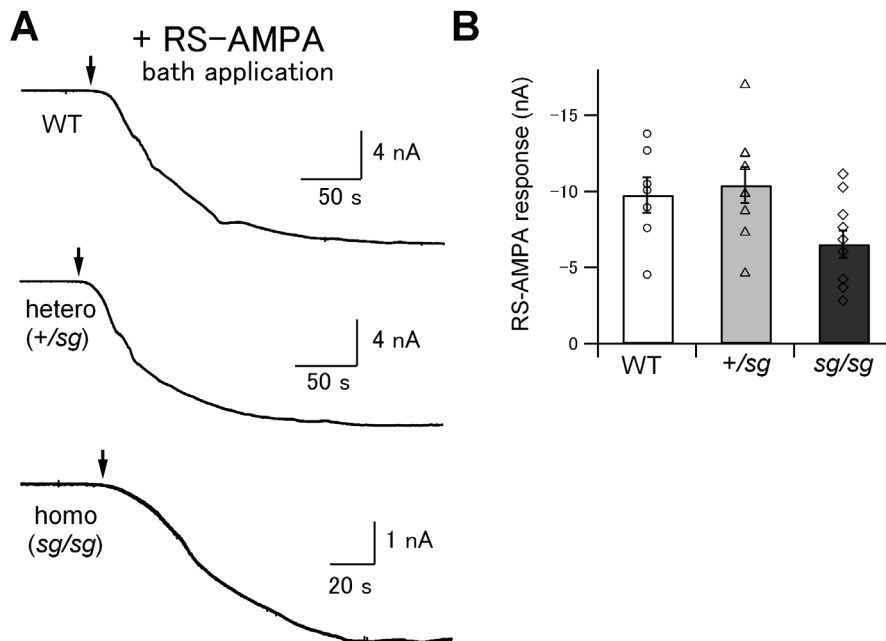

### Supplemental Figure S1. Bath application of RS-AMPA induces reliable AMPA receptor-mediated responses in Purkinje cells

(A) In the presence of TTX (1  $\mu$ M), cyclothiazide (100  $\mu$ M) and CdCl<sub>2</sub> (100  $\mu$ M), an AMPA receptor agonist, RS-AMPA (10  $\mu$ M) was applied to induce AMPA receptor-mediated currents in Purkinje cells of WT and *staggerer* mutant mice. Arrows indicate the time points when the RS-AMPA solution reached the recording chamber.

(B) Pooled data of the AMPA responses recorded in WT, +/sg and sg/sg Purkinje cells. Symbols and bar graphs indicate individual data points and mean values, respectively. Error bars indicate SEM. In all the experimental conditions, AMPA responses were reliably induced in all the recorded Purkinje cells.
